# Supplementary material for: Are Hair Cortisol Levels of Humans, Cats, and Dogs from the Same Household Correlated?
Source: MDPI journal article supplement (doi:10.3390/ani12111472), 2022-06-06
Supplement: s1 [file s1]

DOG

|     | <b>Dog-owner interactions</b>                                                       | at least<br>once a day | once<br>every<br>few days | once a week           | once a<br>month | never            |
|-----|-------------------------------------------------------------------------------------|------------------------|---------------------------|-----------------------|-----------------|------------------|
| 1.  | How often do you kiss your dog?                                                     |                        |                           |                       |                 |                  |
| 2.  | How often do you play with your dog?                                                |                        |                           |                       |                 |                  |
| 3.  | How often do you give your dog treats?                                              |                        |                           |                       |                 |                  |
| 4.  | How often do you groom your dog?                                                    |                        |                           |                       |                 |                  |
| 5.  | How often do you hug your dog?                                                      |                        |                           |                       |                 |                  |
| 6.  | How often do you have your dog with you when you are relaxing, such as watching TV? |                        |                           |                       |                 |                  |
|     | <b>Caregiver's emotional relationship with their dog</b>                            | definitely<br>yes      | yes                       | neither yes nor<br>no | no              | definitely<br>no |
| 7.  | my dog helps me get through difficult times                                         |                        |                           |                       |                 |                  |
| 8.  | my dog is beside me when I need consolation                                         |                        |                           |                       |                 |                  |
| 9.  | even if everyone abandons me, my dog will always be with me                         |                        |                           |                       |                 |                  |
| 10. | I would like to have my dog around all the time                                     |                        |                           |                       |                 |                  |
| 11. | my dog keeps me company all the time                                                |                        |                           |                       |                 |                  |
| 12. | sometimes I tell my dog things I wouldn't tell anyone else                          |                        |                           |                       |                 |                  |
| 13. | my dog watches me all the time and focuses his attention on me                      |                        |                           |                       |                 |                  |
| 14. | I think that the death of my dog will be a traumatic event for me                   |                        |                           |                       |                 |                  |
| 15. | my dog gives me a reason to wake up every morning                                   |                        |                           |                       |                 |                  |
| 16. | I hope that me and my dog will never be separated                                   |                        |                           |                       |                 |                  |

CAT

|     | <b>Cat-owner interactions</b>                                                       | at least<br>once a day | once<br>every<br>few days | once a week           | once a<br>month | never            |
|-----|-------------------------------------------------------------------------------------|------------------------|---------------------------|-----------------------|-----------------|------------------|
| 1.  | How often do you kiss your cat?                                                     |                        |                           |                       |                 |                  |
| 2.  | How often do you play with your cat?                                                |                        |                           |                       |                 |                  |
| 3.  | How often do you give your cat treats?                                              |                        |                           |                       |                 |                  |
| 4.  | How often do you groom your cat?                                                    |                        |                           |                       |                 |                  |
| 5.  | How often do you hug your cat?                                                      |                        |                           |                       |                 |                  |
| 6.  | How often do you have your cat with you when you are relaxing, such as watching TV? |                        |                           |                       |                 |                  |
|     | <b>Związek emocjonalny opiekuna z kotem</b>                                         | definitely<br>yes      | yes                       | neither yes nor<br>no | no              | definitely<br>no |
| 7.  | my cat helps me get through difficult times                                         |                        |                           |                       |                 |                  |
| 8.  | my cat is beside me when I need consolation                                         |                        |                           |                       |                 |                  |
| 9.  | even if everyone abandons me, my cat will always be with me                         |                        |                           |                       |                 |                  |
| 10. | I would like to have my cat around all the time                                     |                        |                           |                       |                 |                  |
| 11. | my cat keeps me company all the time                                                |                        |                           |                       |                 |                  |
| 12. | sometimes I tell my cat things I wouldn't tell anyone else                          |                        |                           |                       |                 |                  |
| 13. | my cat watches me all the time and focuses his attention on me                      |                        |                           |                       |                 |                  |
| 14. | I think that the death of my cat will be a traumatic event for me                   |                        |                           |                       |                 |                  |
| 15. | my cat gives me a reason to wake up every morning                                   |                        |                           |                       |                 |                  |
| 16. | I hope that me and my cat will never be separated                                   |                        |                           |                       |                 |                  |

| How often do you kiss your dog? | N  | Spearman<br>R | t(N-2) | p-value |
|---------------------------------|----|---------------|--------|---------|
| never                           | 11 | 0,035         | 0,104  | 0,919   |
| once every few days             | 7  | 0,218         | 0,500  | 0,638   |
| at least<br>once a day          | 27 | -0,008        | -0,041 | 0,967   |

| How often do you kiss your cat? | N  | Spearman<br>R | t(N-2) | p-value  |
|---------------------------------|----|---------------|--------|----------|
| never                           | 13 | 0,686         | 3,128  | 0,0096** |
| once a month                    | 4  | -0,316        | -0,471 | 0,684    |
| once a week                     | 5  | -0,158        | -0,277 | 0,800    |
| once every few days             | 8  | -0,422        | -1,139 | 0,298    |
| at least<br>once a day          | 25 | -0,206        | -1,007 | 0,324    |

\*\* $p < 0,01$

| How often do you play with your dog? | N  | Spearman<br>R | t(N-2) | p-value |
|--------------------------------------|----|---------------|--------|---------|
| once every few days                  | 17 | -0,014        | -0,053 | 0,959   |
| at least<br>once a day               | 26 | 0,186         | 0,928  | 0,363   |

| How often do you play with your cat? | N  | Spearman<br>R | t(N-2) | p-value |
|--------------------------------------|----|---------------|--------|---------|
| never                                | 3  | 0,500         | 0,577  | 0,667   |
| once a month                         | 6  | 0,414         | 0,910  | 0,414   |
| once a week                          | 3  | 0,000         | 0,000  | 1,000   |
| once every few days                  | 20 | -0,174        | -0,748 | 0,464   |
| at least<br>once a day               | 23 | -0,020        | -0,093 | 0,927   |

| How often do you give your dog treats? | N  | Spearman<br>R | t(N-2) | p-value |
|----------------------------------------|----|---------------|--------|---------|
| once every few days                    | 17 | -0,023        | -0,091 | 0,929   |

|                        |    |       |       |       |
|------------------------|----|-------|-------|-------|
| at least<br>once a day | 25 | 0,316 | 1,599 | 0,123 |
|------------------------|----|-------|-------|-------|

| How often do you give your cat treats? | N  | Spearman<br>R | t(N-2) | p-value |
|----------------------------------------|----|---------------|--------|---------|
| never                                  | 3  | 0,500         | 0,577  | 0,667   |
| once a month                           | 5  | 0,051         | 0,089  | 0,935   |
| once a week                            | 14 | -0,016        | -0,054 | 0,958   |
| once every few days                    | 22 | -0,143        | -0,644 | 0,527   |
| at least<br>once a day                 | 12 | 0,181         | 0,583  | 0,573   |

| How often do you groom your dog? | N  | Spearman<br>R | t(N-2) | p-value |
|----------------------------------|----|---------------|--------|---------|
| once a month                     | 12 | 0,078         | 0,247  | 0,810   |
| once a week                      | 9  | 0,836         | 4,024  | 0,005** |
| once every few days              | 22 | 0,078         | 0,348  | 0,731   |

\*\*  $p < 0,01$

| How often do you groom your cat? | N  | Spearman<br>R | t(N-2) | p-value |
|----------------------------------|----|---------------|--------|---------|
| once a month                     | 27 | -0,112        | -0,562 | 0,579   |
| once a week                      | 10 | -0,128        | -0,366 | 0,724   |
| once every few days              | 15 | -0,142        | -0,519 | 0,612   |

| How often do you hug your dog? | N  | Spearman<br>R | t(N-2) | p-value |
|--------------------------------|----|---------------|--------|---------|
| once every few days            | 3  | -0,866        | -1,732 | 0,333   |
| at least<br>once a day         | 42 | 0,068         | 0,429  | 0,670   |

| How often do you hug your cat? | N  | Spearman<br>R | t(N-2) | p-value |
|--------------------------------|----|---------------|--------|---------|
| once every few days            | 9  | -0,439        | -1,292 | 0,237   |
| at least<br>once a day         | 43 | -0,156        | -1,011 | 0,318   |

| How often do you have your dog with you when you are relaxing, such as watching TV? | N  | Spearman<br>R | t(N-2) | p-value |
|-------------------------------------------------------------------------------------|----|---------------|--------|---------|
| once every few days                                                                 | 6  | 0,034         | 0,068  | 0,949   |
| at least<br>once a day                                                              | 36 | 0,100         | 0,585  | 0,562   |

| How often do you have your cat with you when you are relaxing, such as watching TV? | N  | Spearman<br>R | t(N-2) | p-value |
|-------------------------------------------------------------------------------------|----|---------------|--------|---------|
| once a week                                                                         | 3  | -0,500        | -0,577 | 0,667   |
| once every few days                                                                 | 13 | 0,149         | 0,500  | 0,627   |
| at least<br>once a day                                                              | 34 | -0,254        | -1,483 | 0,148   |

| my dog helps me get through difficult times | N  | Spearman<br>R | t(N-2) | p-value |
|---------------------------------------------|----|---------------|--------|---------|
| yes                                         | 14 | -0,092        | -0,318 | 0,756   |
| definitely yes                              | 28 | 0,237         | 1,242  | 0,225   |

| my cat helps me get through difficult times | N  | Spearman<br>R | t(N-2) | p-value |
|---------------------------------------------|----|---------------|--------|---------|
| neither yes nor no                          | 12 | 0,243         | 0,792  | 0,447   |
| yes                                         | 15 | 0,047         | 0,171  | 0,867   |
| definitely yes                              | 26 | -0,335        | -1,740 | 0,095   |

| my dog is beside me when I need consolation | N  | Spearman<br>R | t(N-2) | p-value |
|---------------------------------------------|----|---------------|--------|---------|
| yes                                         | 13 | -0,045        | -0,151 | 0,883   |
| definitely yes                              | 29 | 0,321         | 1,758  | 0,090   |

| my cat is beside me when I need consolation | N  | Spearman<br>R | t(N-2) | p-value |
|---------------------------------------------|----|---------------|--------|---------|
| no                                          | 4  | -0,400        | -0,617 | 0,600   |
| neither yes nor no                          | 17 | 0,219         | 0,871  | 0,397   |
| yes                                         | 12 | -0,472        | -1,694 | 0,121   |
| definitely yes                              | 22 | -0,262        | -1,214 | 0,239   |

| even if everyone abandons me, my dog will always be with me | N  | Spearman<br>R | t(N-2) | p-value |
|-------------------------------------------------------------|----|---------------|--------|---------|
| neither yes nor no                                          | 7  | 0,218         | 0,500  | 0,638   |
| yes                                                         | 9  | -0,350        | -0,988 | 0,356   |
| definitely yes                                              | 29 | 0,203         | 1,078  | 0,291   |

| even if everyone abandons me, my cat will always be with me | N  | Spearman<br>R | t(N-2) | p-value |
|-------------------------------------------------------------|----|---------------|--------|---------|
| no                                                          | 4  | -0,400        | -0,617 | 0,600   |
| neither yes nor no                                          | 14 | 0,576         | 2,438  | 0,031*  |
| yes                                                         | 19 | -0,030        | -0,124 | 0,903   |
| definitely yes                                              | 17 | -0,347        | -1,43  | 0,172   |

\*  $p < 0,05$

| I would like to have my dog around all the time | N  | Spearman<br>R | t(N-2) | p-value |
|-------------------------------------------------|----|---------------|--------|---------|
| no                                              | 4  | -0,775        | -1,73  | 0,225   |
| neither yes nor no                              | 18 | 0,211         | 0,865  | 0,400   |
| yes                                             | 7  | 0,643         | 1,877  | 0,119   |
| definitely yes                                  | 16 | 0,336         | 1,333  | 0,204   |

| I would like to have my cat around all the time | N  | Spearman<br>R | t(N-2) | p-value |
|-------------------------------------------------|----|---------------|--------|---------|
| no                                              | 4  | -0,894        | -2,828 | 0,106   |
| neither yes nor no                              | 30 | 0,032         | 0,167  | 0,869   |
| yes                                             | 6  | -0,754        | -2,294 | 0,084   |
| definitely yes                                  | 15 | -0,025        | -0,091 | 0,929   |

| my dog keeps me company all the time | N  | Spearman<br>R | t(N-2) | p-value |
|--------------------------------------|----|---------------|--------|---------|
| no                                   | 6  | -0,772        | -2,43  | 0,072   |
| neither yes nor no                   | 10 | 0,330         | 0,990  | 0,351   |
| yes                                  | 10 | 0,000         | 0,000  | 1,000   |
| definitely yes                       | 18 | 0,401         | 1,752  | 0,099   |

| my cat keeps me company all the time | N  | Spearman<br>R | t(N-2) | p-value |
|--------------------------------------|----|---------------|--------|---------|
| no                                   | 19 | -0,086        | -0,354 | 0,727   |
| neither yes nor no                   | 7  | 0,818         | 3,184  | 0,024*  |
| yes                                  | 13 | -0,168        | -0,566 | 0,583   |
| definitely yes                       | 15 | -0,450        | -1,818 | 0,092   |

\*  $p < 0,05$

| sometimes I tell my dog things I wouldn't tell anyone else | N  | Spearman<br>R | t(N-2) | p-value |
|------------------------------------------------------------|----|---------------|--------|---------|
| definitely no                                              | 3  | 0,000         | 0,000  | 1,000   |
| no                                                         | 7  | -0,356        | -0,851 | 0,434   |
| neither yes nor no                                         | 9  | 0,539         | 1,691  | 0,135   |
| yes                                                        | 10 | 0,335         | 1,004  | 0,345   |
| definitely yes                                             | 16 | 0,526         | 2,317  | 0,036*  |

\*  $p < 0,05$

| sometimes I tell my cat things I wouldn't tell anyone else | N  | Spearman<br>R | t(N-2) | p-value |
|------------------------------------------------------------|----|---------------|--------|---------|
| definitely no                                              | 6  | -0,463        | -1,044 | 0,355   |
| no                                                         | 13 | -0,294        | -1,019 | 0,330   |
| neither yes nor no                                         | 8  | 0,037         | 0,091  | 0,931   |

|                |    |        |        |       |
|----------------|----|--------|--------|-------|
| yes            | 13 | -0,346 | -1,225 | 0,246 |
| definitely yes | 15 | 0,232  | 0,859  | 0,406 |

\*  $p < 0,05$

|                                                                |    |               |        |         |
|----------------------------------------------------------------|----|---------------|--------|---------|
| my dog watches me all the time and focuses his attention on me | N  | Spearman<br>R | t(N-2) | p-value |
| no                                                             | 8  | -0,741        | -2,700 | 0,036*  |
| neither yes nor no                                             | 6  | 0,412         | 0,904  | 0,417   |
| yes                                                            | 16 | 0,209         | 0,800  | 0,437   |
| definitely yes                                                 | 15 | 0,260         | 0,971  | 0,349   |

\*  $p < 0,05$

|                                                                |    |               |        |         |
|----------------------------------------------------------------|----|---------------|--------|---------|
| my cat watches me all the time and focuses his attention on me | N  | Spearman<br>R | t(N-2) | p-value |
| definitely no                                                  | 3  | -0,500        | -0,577 | 0,667   |
| no                                                             | 19 | 0,085         | 0,351  | 0,730   |
| neither yes nor no                                             | 11 | 0,285         | 0,892  | 0,395   |
| yes                                                            | 14 | -0,289        | -1,05  | 0,317   |
| definitely yes                                                 | 8  | -0,539        | -1,567 | 0,168   |

|                                                                   |    |               |        |         |
|-------------------------------------------------------------------|----|---------------|--------|---------|
| I think that the death of my dog will be a traumatic event for me | N  | Spearman<br>R | t(N-2) | p-value |
| yes                                                               | 9  | -0,079        | -0,210 | 0,839   |
| definitely yes                                                    | 36 | 0,060         | 0,350  | 0,728   |

|                                                                   |    |               |        |         |
|-------------------------------------------------------------------|----|---------------|--------|---------|
| I think that the death of my cat will be a traumatic event for me | N  | Spearman<br>R | t(N-2) | p-value |
| yes                                                               | 20 | 0,197         | 0,853  | 0,405   |
| definitely yes                                                    | 31 | -0,303        | -1,714 | 0,097   |

|                                                   |    |               |        |         |
|---------------------------------------------------|----|---------------|--------|---------|
| my dog gives me a reason to wake up every morning | N  | Spearman<br>R | t(N-2) | p-value |
| neither yes nor no                                | 15 | -0,009        | -0,033 | 0,974   |
| yes                                               | 8  | 0,143         | 0,354  | 0,736   |
| definitely yes                                    | 19 | 0,583         | 2,962  | 0,009** |

\*\*  $p < 0,01$

|                                                   |    |               |        |         |
|---------------------------------------------------|----|---------------|--------|---------|
| my cat gives me a reason to wake up every morning | N  | Spearman<br>R | t(N-2) | p-value |
| definitely no                                     | 3  | -0,866        | -1,732 | 0,333   |
| neither yes nor no                                | 21 | 0,224         | 1,003  | 0,329   |
| yes                                               | 13 | -0,704        | -3,289 | 0,007** |
| definitely yes                                    | 16 | 0,150         | 0,568  | 0,579   |

\*\*  $p < 0,01$

|                                                   |    |               |        |         |
|---------------------------------------------------|----|---------------|--------|---------|
| I hope that me and my dog will never be separated | N  | Spearman<br>R | t(N-2) | p-value |
| neither yes nor no                                | 4  | -0,258        | -0,378 | 0,742   |
| yes                                               | 11 | -0,023        | -0,069 | 0,947   |

|                |    |        |        |       |
|----------------|----|--------|--------|-------|
| definitely yes | 30 | -0,006 | -0,032 | 0,975 |
|----------------|----|--------|--------|-------|

| I hope that me and my cat will never be separated | N  | Spearman R | t(N-2) | p-value |
|---------------------------------------------------|----|------------|--------|---------|
| neither yes nor no                                | 13 | 0,064      | 0,213  | 0,836   |
| yes                                               | 16 | -0,018     | -0,067 | 0,948   |
| definitely yes                                    | 26 | -0,081     | -0,397 | 0,695   |

| Pair of Variables                                         | N  | Spearman R | t(N-2) | p-value |
|-----------------------------------------------------------|----|------------|--------|---------|
| owner cortisol (ng/ml) & female dog cortisol (ng/ml)      | 27 | -0,029     | -0,143 | 0,888   |
| owner cortisol (ng/ml) & male dog cortisol (ng/ml)        | 18 | 0,022      | 0,087  | 0,932   |
| owner cortisol (ng/ml) & female cat cortisol (ng/ml)      | 31 | 0,191      | 1,045  | 0,304   |
| owner cortisol (ng/ml) & male cat cortisol (ng/ml)        | 24 | -0,461     | -2,44  | 0,023*  |
| female cat cortisol (ng/ml) & female dog cortisol (ng/ml) | 51 | 0,075      | 0,528  | 0,600   |
| female cat cortisol (ng/ml) & male dog cortisol (ng/ml)   | 28 | 0,183      | 0,950  | 0,351   |
| male cat cortisol (ng/ml) & female dog cortisol (ng/ml)   | 22 | 0,072      | 0,325  | 0,749   |
| male cat cortisol (ng/ml) & male dog cortisol (ng/ml)     | 27 | 0,201      | 1,025  | 0,315   |

\*  $p < 0,05$
